# Supplementary material for: Thermal structure of the Venusian atmosphere from the sub-cloud region to the mesosphere as observed by radio occultation
Source: PubMed Central journal article supplement (PMC7044293; doi:10.1038/s41598-020-59278-8), 2020-02-26
Supplement: 41598_2020_59278_MOESM1_ESM.pdf [file 41598_2020_59278_MOESM1_ESM.pdf]

1 **Supplementary information**

2

3 **Thermal structure of the Venusian atmosphere from the sub-**

4 **cloud region to the mesosphere as observed by radio**

5 **occultation**

6 \*Hiroki Ando<sup>1</sup> (hando@cc.kyoto-su.ac.jp), Takeshi Imamura<sup>2</sup>, Silvia Tellmann<sup>3</sup>,

7 Martin Pätzold<sup>3</sup>, Bernd Häusler<sup>4</sup>, Norihiko Sugimoto<sup>5</sup>, Masahiro Takagi<sup>1</sup>,

8 Hideo Sagawa<sup>1</sup>, Sanjay Limaye<sup>6</sup>, Yoshihisa Matsuda<sup>7</sup>, Rajkumar Choudhary<sup>8</sup> and

9 Maria Antonita<sup>9</sup>

10

11 1: Kyoto Sangyo University, 2: The University of Tokyo, 3: Universität zu Köln,

12 4: Universität der Bundeswehr München, 5: Keio University, 6: Keio University,

13 7: Tokyo Gakugei University, 8: Vikram Sarabhai Space Center,

14 9: Indian Space Research Organization

15

16

17 **1. Detail of the comparison of the temperature distributions obtained by the radio**

18 **occultation measurements, VIRA and VIRA-2**

19 Fig. S1 shows temperature differences among the radio occultation measurements,  
20 VIRA and VIRA-2. Fig. S2 shows the temperature distributions obtained from the  
21 Akatsuki and Venus Express radio occultation measurements. Although the temperature  
22 obtained on the Akatsuki mission is 2–5 K lower than that obtained on the Venus  
23 Express mission at all altitudes (see also Fig. S1), the shape and curvature of these  
24 temperature profiles are similar. The static stabilities obtained from these radio  
25 occultation measurements are then almost consistent as shown in Fig. S3.

26

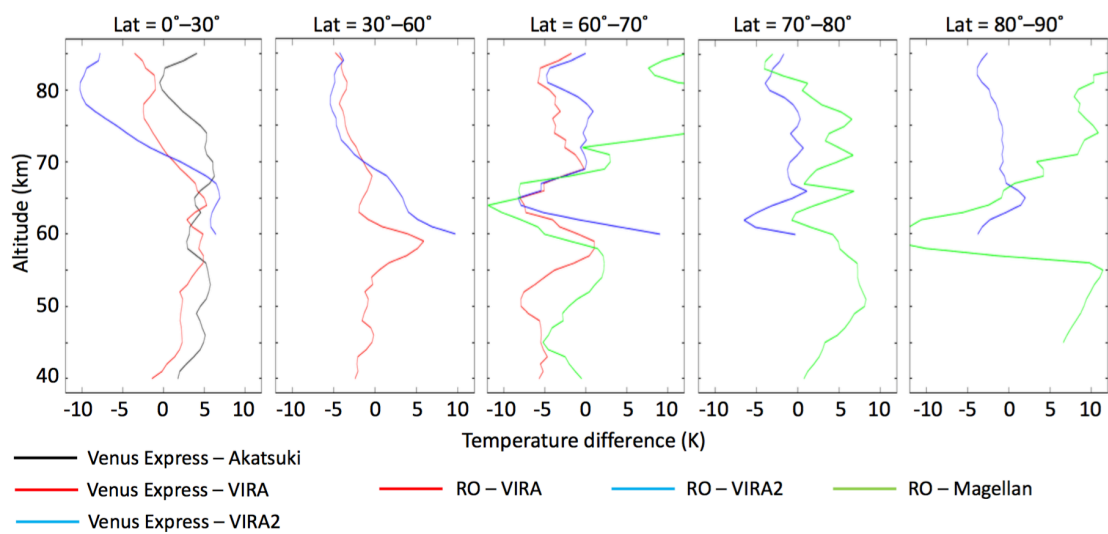

27

28 **Figure S1 | Differences in temperature among radio occultation measurements,**

29 **VIRA and VIRA-2.** At latitudes of  $0^{\circ}$ – $30^{\circ}$ , the temperature differences between Venus  
30 Express and Akatsuki (black), between Venus Express and VIRA (red), and between  
31 Venus Express and VIRA-2 (blue) are shown. At other latitudes, the temperature  
32 differences between the present study and VIRA (red) and between VIRA-2 (blue) and  
33 Magellan radio occultation measurements (green) are shown.

34

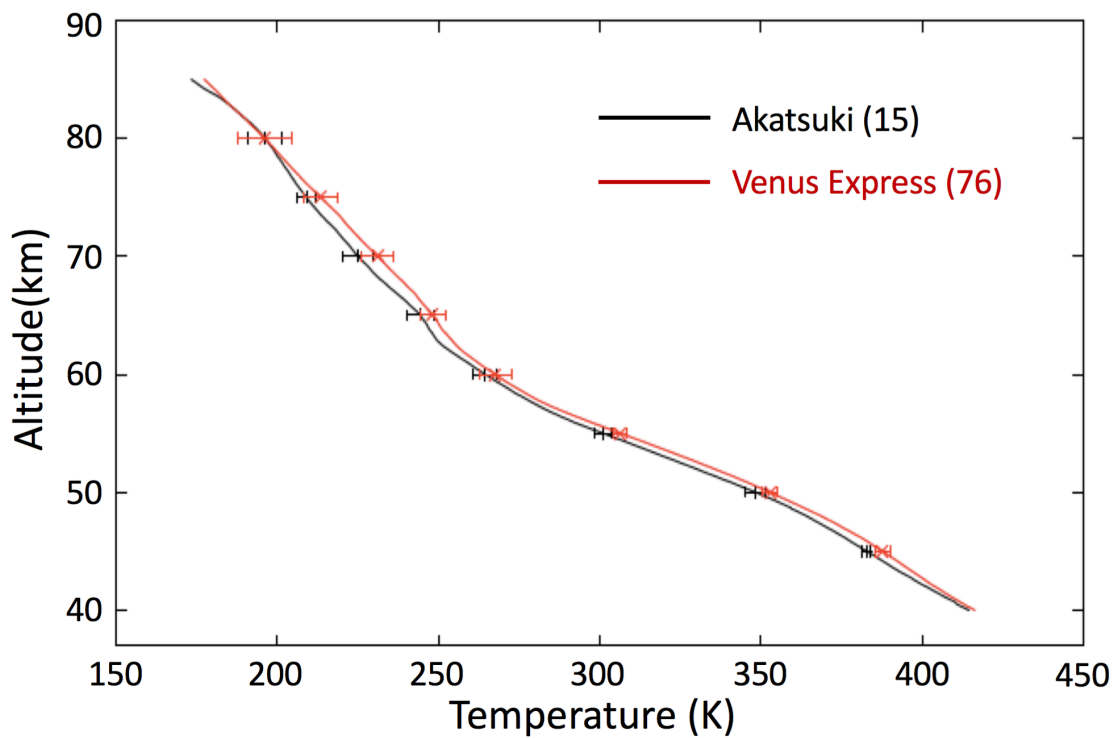

35

36 **Figure S2 | Comparison of mean temperatures at altitudes of 40–85 km for**  
37 **latitudes of  $0^{\circ}$ – $30^{\circ}$  obtained from radio occultation measurements made on (black)**  
38 **Akatsuki and (red) Venus Express missions.** The number within parentheses in each

39 panel is the number of radio occultation measurements made at an altitude of 50 km. An

40 error bar represents the standard deviation of the temperature.

41

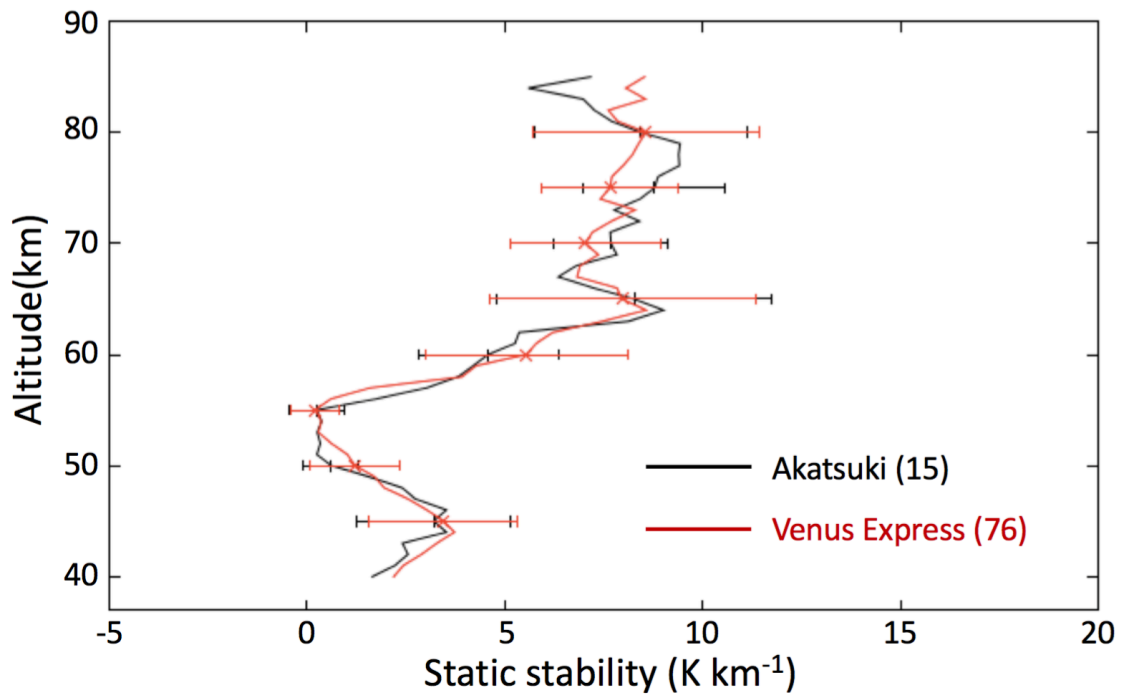

42

43 **Figure S3 | Comparison of mean static stabilities at altitudes of 40–85 km for**

44 **latitudes of 0°–30° obtained from radio occultation measurements made on (black)**

45 **Akatsuki and (red) Venus Express missions.** The number within parentheses in each

46 panel is the number of radio occultation data measurements made at an altitude of 50

47 km. An error bar represents the standard deviation of the temperature.

48

49 **2. Measurement error due to horizontal drift**

50 Venus Express had a polar orbit. Horizontal drift of the ray path tangent point thus  
51 generated measurement error in the temperature at low latitudes. The error is estimated  
52 here following the work of Kursinski et al. (1997).

53 The bending angle error,  $\delta\alpha(z, z_0, y)$ , due to horizontal drift of the ray path tangent  
54 point is expressed to the first order as

55 
$$\delta\alpha(z, z_0, y) = \Delta y(z, z_0, y) \frac{\partial\alpha}{\partial y}(z, y) , \quad (\text{A1})$$

56 where  $y$  represents latitude and  $z$  is the height of the error,  $z_0$  is the altitude of the  
57 lower integration limit of the Abel transform and the altitude of the refractivity retrieval,  
58 and  $\Delta y$  is the horizontal distance that the ray path tangent point drifts between  $z$  and  
59  $z_0$ . For simplicity, we assume that  $\alpha$  is proportional to the vertical density gradient  
60 such that  $\alpha \sim c\rho/H$ , where  $c$  is a scale factor,  $\rho$  is the mass density and  $H = RT/g$   
61 is the density scale height, with  $R$ ,  $T$  and  $g$  respectively being the gas constant,  
62 temperature and gravity acceleration. Making this assumption, it follows that

63 
$$\frac{1}{\alpha} \frac{\partial\alpha}{\partial y}(z, y) \sim \frac{1}{\rho} \frac{\partial\rho}{\partial y}(z, y) - \frac{1}{T} \frac{\partial T}{\partial y}(z, y) . \quad (\text{A2})$$

64 In the case of Venus, the cyclostrophic balance can be applied as

65 
$$\frac{u_c^2 \tan \varphi}{a} = -\frac{1}{\rho} \frac{\partial p}{\partial y}, \quad (\text{A3})$$

66 where  $a$  is the radius of Venus,  $u_c$  is the cyclostrophic wind,  $p$  is pressure and  $\varphi$  is the  
67 latitude. Taking the vertical gradient of (A3) gives

68 
$$\frac{\partial}{\partial z} \left( \frac{\rho u_c^2}{a} \right) = -\frac{1}{\tan \varphi} \frac{\partial}{\partial y} \left( \frac{\partial p}{\partial z} \right) = \frac{g}{\tan \varphi} \frac{\partial \rho}{\partial y}. \quad (\text{A4})$$

69 The first term on the right-hand side of (A2) can therefore be rewritten as

70 
$$\frac{1}{\rho} \frac{\partial \rho}{\partial y} (z, y) = \frac{\tan \varphi}{ag} \left( 2u_c \frac{\partial u_c}{\partial z} + \frac{u_c^2}{\rho} \frac{\partial \rho}{\partial z} \right) = \frac{\tan \varphi}{ag} \left( 2u_c \frac{\partial u_c}{\partial z} - \frac{u_c^2}{H} \right). \quad (\text{A5})$$

71 The second term on the right-hand side of (A2) is related to the vertical gradient of the  
72 cyclostrophic wind such that

73 
$$\frac{\partial}{\partial z} \left( \frac{u_c^2 \tan \varphi}{a} \right) = -\frac{R}{H} \frac{\partial T}{\partial y} = -\frac{g}{T} \frac{\partial T}{\partial y}. \quad (\text{A6})$$

74 Accordingly, (A2) is finally described as

75 
$$\frac{1}{\alpha} \frac{\partial \alpha}{\partial y} (z, y) = \frac{\tan \varphi}{ag} \left( 4u_c \frac{\partial u_c}{\partial z} - \frac{u_c^2}{H} \right). \quad (\text{A7})$$

76 The fractional error in the bending angle due to horizontal drift of the ray path tangent  
77 point is then written as

78 
$$\frac{\delta \alpha}{\alpha} = \frac{\tan \varphi}{ag} \left( 4u_c \frac{\partial u_c}{\partial z} - \frac{u_c^2}{H} \right) \Delta y. \quad (\text{A8})$$

79 The radius ( $a$ ) is 6050 km, gravitational acceleration ( $g$ ) is  $8.87 \text{ m s}^{-2}$ , the density scale  
80 height ( $H$ ) is fixed at 5 km and the latitude ( $\varphi$ ) is fixed at  $20^\circ$ . We consider the two

81 altitude ranges of 40–50 km and 60–70 km. In the case of the Venus Express radio  
82 occultation measurements made at low latitude,  $\Delta y$  is approximately  $10^3$  km at  
83 altitudes of 40–50 km and  $10^2$  km at altitudes of 60–70 km, which corresponds to  
84 latitudinal movement of  $\sim 10^\circ$  and  $\sim 1^\circ$ , respectively. Inserting these values into (A8) to  
85 calculate the temperature measurement error ( $\delta T$ ) yields  $\delta\alpha/\alpha \sim 6.7 \times 10^{-4}$  and  $\delta T \sim$   
86 0.05 K at altitudes of 40–50 km and  $\delta\alpha/\alpha \sim 2.7 \times 10^{-4}$  and  $\delta T \sim 0.03$  K at altitudes  
87 of 60–70 km. These  $\delta T$  values are smaller than the measurement error of 0.1 K, which  
88 is associated with the stability of the oscillator onboard the spacecraft.

89

## 90 **References**

91 Kursinski, E. R., Hajj, G. A., Schofield, J. T., Linfield, R. P. & Hardy, K. R. Observing  
92 Earth's atmosphere with radio occultation measurements using the Global Positioning  
93 System. *J. Geophys Res.* **102**, 23429–23466 (1997).

94

## 95 **Figure legends**

96 **Figure S1 | Differences in temperature among radio occultation measurements,**

97 **VIRA and VIRA-2.** At latitudes of  $0^{\circ}$ – $30^{\circ}$ , the temperature differences between Venus  
98 Express and Akatsuki (black), between Venus Express and VIRA (red), and between  
99 Venus Express and VIRA-2 (blue) are shown. At other latitudes, the temperature  
100 differences between the present study and VIRA (red) and between VIRA-2 (blue) and  
101 Magellan radio occultation measurements (green) are shown.

102

103 **Figure S2 | Comparison of mean temperatures at altitudes of 40–85 km for**  
104 **latitudes of  $0^{\circ}$ – $30^{\circ}$  obtained from radio occultation measurements made on (black)**  
105 **Akatsuki and (red) Venus Express missions.** The number within parentheses in each  
106 panel is the number of radio occultation measurements made at an altitude of 50 km. An  
107 error bar represents the standard deviation of the temperature.

108

109 **Figure S3 | Comparison of mean static stabilities at altitudes of 40–85 km for**  
110 **latitudes of  $0^{\circ}$ – $30^{\circ}$  obtained from radio occultation measurements made on (black)**  
111 **Akatsuki and (red) Venus Express missions.** The number within parentheses in each  
112 panel is the number of radio occultation data measurements made at an altitude of 50



113 km. An error bar represents the standard deviation of the temperature.
